# Supplementary material for: Post-Vaccination SARS-CoV-2 Infections among Health Workers at the University Hospital of Verona, Italy: A Retrospective Cohort Survey
Source: MDPI journal article supplement (doi:10.3390/vaccines10020272), 2022-02-10
Supplement: s1 [file s1]

**Table S1.** Questionnaire.

| Topic                                          | Questions                                                                                                                                                                                                                                                                                                                                                                                                                               |
|------------------------------------------------|-----------------------------------------------------------------------------------------------------------------------------------------------------------------------------------------------------------------------------------------------------------------------------------------------------------------------------------------------------------------------------------------------------------------------------------------|
| Positive Rt-PCR test before December 27th 2021 | 1. Previous SARS-CoV-2 swab positivity? <input type="checkbox"/> Yes <input type="checkbox"/> No                                                                                                                                                                                                                                                                                                                                        |
|                                                | 2. If yes, please specify year and month: .....                                                                                                                                                                                                                                                                                                                                                                                         |
|                                                | 3. If yes, have you had any symptoms? <input type="checkbox"/> Yes <input type="checkbox"/> No                                                                                                                                                                                                                                                                                                                                          |
|                                                | 4. If yes, please specify (multiple answers are possible):<br><input type="checkbox"/> rhinorrhea <input type="checkbox"/> headache<br><input type="checkbox"/> headache <input type="checkbox"/> malaise<br><input type="checkbox"/> cough <input type="checkbox"/> dyspnea<br><input type="checkbox"/> burning or pain in throat <input type="checkbox"/> ageusia<br><input type="checkbox"/> fever <input type="checkbox"/> anosmia  |
|                                                | 5. If yes, please specify duration (except for loss of sense of taste or smell):<br><input type="checkbox"/> 1-3 days <input type="checkbox"/> 3-7 days <input type="checkbox"/> >7 days                                                                                                                                                                                                                                                |
|                                                | 6. Have you been hospitalized? <input type="checkbox"/> Yes <input type="checkbox"/> No                                                                                                                                                                                                                                                                                                                                                 |
| Vaccination and any adverse reaction           | 7. Have you been vaccinated? <input type="checkbox"/> Yes <input type="checkbox"/> No                                                                                                                                                                                                                                                                                                                                                   |
|                                                | 8. Did you have any side effects (adverse drug reactions) after the 1 <sup>st</sup> and or after the 2 <sup>nd</sup> vaccine dose?                                                                                                                                                                                                                                                                                                      |
|                                                | 9. If yes, please specify (multiple answers are possible):<br><input type="checkbox"/> injection site pain <input type="checkbox"/> headache<br><input type="checkbox"/> arthralgia/myalgia <input type="checkbox"/> malaise<br><input type="checkbox"/> fever <input type="checkbox"/> others (please specify)                                                                                                                         |
|                                                | 10. If yes, please specify duration:<br><input type="checkbox"/> 1-3 days <input type="checkbox"/> 3-7 days <input type="checkbox"/> >7 days                                                                                                                                                                                                                                                                                            |
| Symptoms associated with Rt-PCR test positive  | 11. Have you had any symptoms? <input type="checkbox"/> Yes <input type="checkbox"/> No                                                                                                                                                                                                                                                                                                                                                 |
|                                                | 12. If yes, please specify (multiple answers are possible):<br><input type="checkbox"/> rhinorrhea <input type="checkbox"/> headache<br><input type="checkbox"/> headache <input type="checkbox"/> malaise<br><input type="checkbox"/> cough <input type="checkbox"/> dyspnea<br><input type="checkbox"/> burning or pain in throat <input type="checkbox"/> ageusia<br><input type="checkbox"/> fever <input type="checkbox"/> anosmia |
|                                                | If yes, please specify duration (except for loss of sense of taste or smell):<br><input type="checkbox"/> 1-3 days <input type="checkbox"/> 3-7 days <input type="checkbox"/> >7 days                                                                                                                                                                                                                                                   |
|                                                | 13. Have you been hospitalized?                                                                                                                                                                                                                                                                                                                                                                                                         |
|                                                |                                                                                                                                                                                                                                                                                                                                                                                                                                         |
| Contacts after December 27th 2021              | 14. Did you know you had contact with a SARS-CoV-2 positive person?<br>If yes, what was the setting?<br><input type="checkbox"/> Occupational <input type="checkbox"/> Home <input type="checkbox"/> I do not know                                                                                                                                                                                                                      |
|                                                | 15. Did the infected person show respiratory symptoms? <input type="checkbox"/> Yes <input type="checkbox"/> No                                                                                                                                                                                                                                                                                                                         |
|                                                | 16. Were you wearing personal protective equipment for the airways during contact?<br><input type="checkbox"/> Yes <input type="checkbox"/> No                                                                                                                                                                                                                                                                                          |
| Contagiousness after December 27th 2021        | 17. Were there any people infected after contact with you? <input type="checkbox"/> Yes <input type="checkbox"/> No                                                                                                                                                                                                                                                                                                                     |
|                                                | 18. If yes, what was the setting?<br><input type="checkbox"/> Occupational <input type="checkbox"/> Home <input type="checkbox"/> Both                                                                                                                                                                                                                                                                                                  |
|                                                | 19. If yes, how many days later the infection was diagnosed?<br><input type="checkbox"/> 1-3 days <input type="checkbox"/> 3-7 days <input type="checkbox"/> 8-14 days                                                                                                                                                                                                                                                                  |
|                                                | 20. If yes, were you wearing personal protective equipment for the airways during contact?<br><input type="checkbox"/> Yes <input type="checkbox"/> No                                                                                                                                                                                                                                                                                  |
|                                                | 21. If yes, has the infected person developed symptoms? <input type="checkbox"/> Yes <input type="checkbox"/> No                                                                                                                                                                                                                                                                                                                        |
|                                                | 22. If yes, has the infected person been hospitalized due to Covid-19 related symptoms? <input type="checkbox"/> Yes <input type="checkbox"/> No                                                                                                                                                                                                                                                                                        |

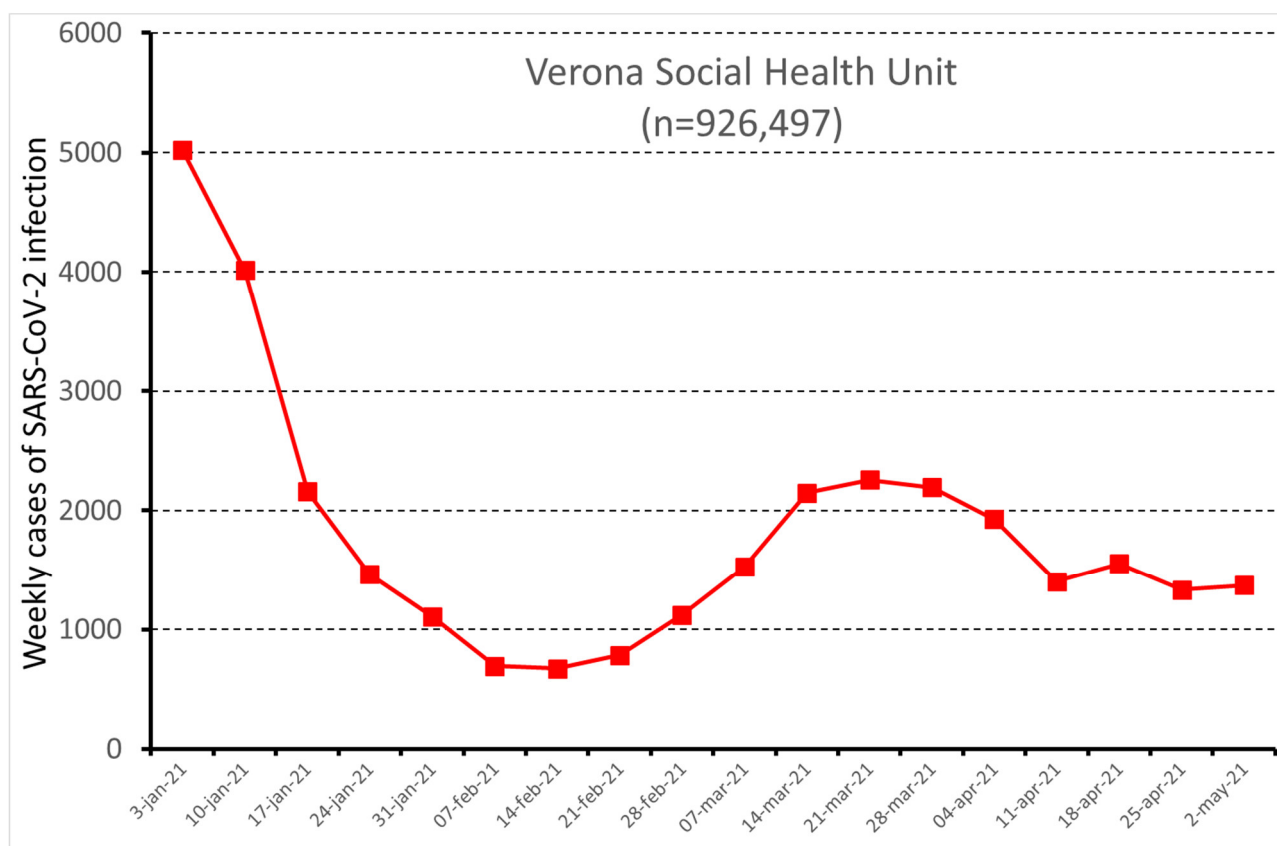

**Figure S1:** Weekly cases of SARS-CoV2 infection in the Verona Social Health Unit. The end of the week considered is reported on the X axis. The incidence of SARS-CoV-2 infection in Verona Social Health Unit (the local articulation of the public health authority system) was not stable, particularly in the first half of the observation period, when the number of weekly cases ranged from 5022 to 671. The incidence remained a bit more stable in March-April, when weekly cases ranged from 1333 to 2259.
